# Supplementary material
Source: publisher site journal article supplement (https://www.dovepress.com/article/287600)
Supplement: Supplementary file 1 [file get_supplementary_file.php]

**Supplementary material 1**

**Questionnaire for Dessei City Residents( KAP on COVID-19 )**

**Part I. Socio demographic characteristic**  Date ……….…/09/2012

1. Sub city, ……………… District……………… Kebele_____
2. Age_________
3. Sex: A, Male B, Female
4. Religion A. Orthodox B. Muslim C. Protestant D. Catholic E. Others, specify________
5. What is your current marital status?

A. Married B. Single C. Divorced D. Windowed

1. What is your level of education?
2. Unable to read and write B. Read and write C. Completed Grade ---------

D. Diploma F. University degree G. Other (specify) ……

1. What is your current job?

A= House wife B. Farmer C=Employed D=Merchant

E= Daily laborer F= Student G= others, specify_____

1. Do you have TV in your home? A, Yes B, No
2. Do you have Radio in your home? A, Yes B, No
3. Do you have a personal telephone? A, Yes B, No
4. Currently, are you a social media/facebook,….etc) user? A, Yes B, No

**Part II: KNOWLEDGE ASSESSMENT (*More than one option is possible)***

1. Have you heard of the current epidemic/pandemic? A= Yes B= No
2. From where you heard the information? ***(More than one option is possible)***

A, TV B, Radio C, Social media/facebook, etc D, Health worker

E. Others……………………………..

1. What is the official name of the disease/ pandemic currently attacking peoples in the world?

A, Yes (Corona virus) B. No (Other)

1. What are the main clinical symptoms of corona virus disease?

A, Fever B. Fatigue & myalgia C. Dry cough D. Shortness of breath

E. Loss of appetite F. Common cold like symptoms G. Others………………

1. Corona virus spreads via:
   - - 1. Respiratory droplets of infected individuals during sneezing and coughing
       2. Direct contact to infected person (hand shaking, skin to skin,)
       3. Indirect contact to objects & utensils contaminated by corona virus (fomite, surface, etc)
       4. Eating contaminated vegetables and uncooked meats
       5. Air born F, Other………………………………….
2. Persons with COVID-2019 cannot transmit the virus to others when symptoms not present.
   - - 1. Yes B. No C. I don’t know
3. To protect ourselves from corona virus infection we should do:
   1. Frequent hand washing with soap
   2. Avoid hand shaking
   3. Keeping at least 2 metre physical distance
   4. Staying at home
   5. Alcohol based hand rub (sanitizer’s)
   6. Avoiding visiting crowded places and mass gatherings
   7. Following good respiratory hygiene
   8. Isolation and treatment of the case
   9. Avoid touching eyes, mouth and nostrils before washing hands
   10. Using personal protective equipment’s like face mask
   11. Stay informed and follow healthcare workers advice
   12. Others……………………………………………………………………
4. Only one of the above methods (face mask or hand washing, etc…) is adequate to prevent corona virus infection?

A, Yes B. No C. I don’t know

1. Which segment of the population is **at risk of getting** corona virus infection?
2. All age group and both sex E, Men
3. Geriatrics/Older peoples F, Women
4. Children and young adults G, Other……………...
5. People with chronic diseases
6. Which segment of the population appears to be more vulnerable to becoming **severely ill or die** with the virus?
   - - 1. Older people/Geriatrics
       2. People with chronic diseases (such as asthma, diabetes, heart disease, obese)
       3. All age group and both sex F. Males
       4. Children and young adults G. Female
       5. Others……………………..
7. It is not necessary for children and young adults to take measures to prevent corona virus infection

A, Yes B. No C. I don’t know

1. When do you suspect that an individual might have a corona virus?

A, One of COVID_19 symptoms plus Travel history

B, One of COVID_19 symptoms Plus Contact History

C, One of COVID_19 symptoms Plus Occupational risk

D, COVID_19 symptoms only

1. How do we confirm that whether an individual is infected with a corona virus or not?

A, Through laboratory test B, Using signs and symptoms

C, If he comes from abroad D, Contact History E, Other………………

1. If an individual is confirmed to have corona virus, then what activities the gov’t has to do?
   - - 1. Isolation and treatment of the case
       2. Contacts tracing and quarantining
       3. Performing lab tests for contacts
       4. Disinfection of houses and utensils of a COVID 19 case
       5. Others…………………………………
2. A person who has contact with a confirmed COVID 19 case should be quarantined for how many days?

A. Yes ( If the response is 14 days) B. No (Other responses

1. Is there any person who died of corona virus in Ethiopia?

A. Yes B. No C. I don’t know

1. Currently, is there any drug that can cure COVID 19 cases?

A, Yes B. No C. I don’t know

1. Currently, is there a vaccine for the coronavirus disease?

A, Yes B. No C. I don’t know

1. All individuals infected with corona virus will die?

A, Yes B. No C. I don’t know

|  | **Part III: Attitude Questions** | **Agree ✓** | **disagree✓** | **I don’t know✓** |
| --- | --- | --- | --- | --- |
| 1 | Do you agree that corona virus will not infect or kill African origins or Ethiopians? |  |  |  |
| 2 | Do you agree that COVID 19 only infects elders?( not infect children’s and young adults?) |  |  |  |
| 3 | Some people says that there is no need to bother about COVID 19 prevention strategies; because God/Allah will protect his creators from corona virus infection? Do you agree with this idea? |  |  |  |
| 4 | Do you think that avoiding mass gatherings (absenting from market, wedding, etc) will prevent corona virus infection? |  |  |  |
| 5 | Do you believe that frequent hand washing and using sanitizers can prevent corona virus infection? |  |  |  |
| 6 | Do you believe that staying at home can prevent corona virus infection? |  |  |  |
| 7 | Do you believe that maintaining a physical distancing can prevent corona virus infection? |  |  |  |
| 8 | Do you think that cultural medications like *Fetto, lemon, ginger, shinkurt, honey*, etc ) can prevent and/or cure COVID 19 cases? |  |  |  |
| 9 | Do you agree that COVID-19 is a preventable disease? |  |  |  |
| 10 | Do you advice corona virus prevention strategies for your friends and families? | Yes | No |  |
| 11 | If your intimate friend recently comes from a COVID 19 affected countries without being quarantined for 14 days, what will you do? | I will report to local authority | Other responses |  |
| 12 | If the price of corona virus prevention strategies (Soap, sanitizers, water etc) become too costly or not available what will you do? | I will buy it | Other responses |  |

**Part IV Practice part**

- - - 1. Which preventive measures are you mostly practicing to protect yourself from
         COVID-19? [ Tick all the option/s that is/are true for you]

1. I avoided going to crowded places
2. I avoided taking public transportations
3. I avoided shaking hands
4. I am keeping physical/social distance
5. I avoided touching eyes, nose and mouth before I washed my hands
6. I wash my hands frequently with soap and water
7. I am using alcohol-based hand rub
8. I cover my cough using the bend of your elbow or a tissue
9. I am staying at home
10. Stay informed and follow advice given by your healthcare provider
11. I use mask when leaving home or at my work place
12. I am not practicing any preventive measures
    - - 1. In recent days, have you gone to any crowded place (church, mosque, market, etc)? A, Yes B. No
        2. In recent days, when do you wash your hands?
    1. After touching any others objects C. Before feeding a child
    2. Before and after eating, before cooking D. After assisting child defecations
    3. Other……………………………..
       - 1. In recent days, how many times a day you wash your hands? ………………… times
         2. In recent days, how much times your hand washing behaviour has increased as compared to the era of no corona virus infection?

A, Not increased B, two times C, Three times D, Four times E,………….times

- - - 1. How frequent are you using a soap for hand washing?

A. Always B, Sometimes C. I am not using soap at all

- - - 1. Do you have a sanitizer in your home? A, Yes B. No
      2. In recent days, do you have a **direct contact** like hand shaking with someone other than your family?

A, Yes B. No

- - - 1. In a recent day, how much hours you spend out of your home? ………………hours.
      2. Are you applying social distancing strategy to prevent corona virus infection?

A, Yes B, No

- - - 1. In recent days, are you using a face mask when leaving home?

A, Yes B. No

Observational part

- - - 1. Does he washed his hands at entry to the organization?

A, Yes B, No

- - - 1. Does he used a soap while washing his hands?

A, Yes B, No

- - - 1. Does he washed his hands appropriately?

A, Yes B, No

- - - 1. Does he have a sanitizer at hand?

A, Yes B, No

- - - 1. Currently, is the respondent wearing a face mask ?

A, Yes B, No

- - - 1. Does he maintained a 2 metre social distancing throughout his stay in the organization?

A, Yes B, Partially C, No

Name and signature of data collector ______________

***Thanks for your cooperation!***
